# Supplementary material for: A pediatric virtual care evaluation framework and its evolution using consensus methods
Source: BMC Pediatr. 2023 Aug 17;23:402. doi: 10.1186/s12887-023-04229-1 (PMC10433580; doi:10.1186/s12887-023-04229-1)
Supplement: Supplementary file 2 — Additional file 2. Virtual Care Evaluation Framework. [file 12887_2023_4229_MOESM2_ESM.xlsx]

## Sheet: Revision log
Revision log:	Files will be named according to the version control system discussed at the May 11th meeting, but this log will document further details of changes made to each version
Version #	Date	Edits made by	Comments
	2021-05-08	Various	To date, various comments and edits were made by several members of the committee, including significant input from Claudia Malic and Steph Sutherland. From this point onwards, specific changes will be tracked in this log.
1.2	2021-05-09	Individual Experience Sub-group	Catherine, Justyna and Ellen revised the Individual Experience section. The "Anticipated Data Source" was also deleted, merged with New Data source.
1.6	2021-06-03	Steph Sutherland	Met with smallgroups, one per section and compiled revisions. Items that still need attention are (in no particular order): -Effectiveness needs to be operationalized (in the context of a question) -Under 'Basis of Comparison' you will see Provincial Reports a lot. If there is a name (if such a report exists) it should be used -(row 23) I moved one of Catherine's group suggestions (I combined row…
1.7	2021-06-04	Catherine Dulude	Review and structural changes to support clarity.
1.9	2021-06-16	Ellen Goldbloom	Health Outcomes: added common physiologic health outcomes and defined as individual and population level and provided specific examples; removed "pts needing to be hospitalized for testing positive for covid as neither CD nor I understood how this fit wrt VC; changed the asthma control example significantly (made major question less specific but examples more specific and removed patient and prov…
			Health Care Delivery - moved several items from health outcomes to this section; refined questions and measures for effectiveness; separated privacy into 2 separate questions; removed clinic wait times from timeliness section as this is efficiency (added to that section); added equity question; I think we can rework the conssitency/approp one into effectiveness
			Individual exp - removed burden/benefit row that was pulled from health outcomes and divided it up into other sections - explicitly put it in patient centeredness; added net promotor score (from STEM); added details to patiennt centeredness; added staff wellness and burnout, question about usability (overall c/w in person... not just of tech)
			Progarm Imp - added KPI
1.12	2021-06-22	Karen Macaulay	Added information for Prgram Implemenation
1.13-1.15	2021-07-07	Catherine Dulude, Ellen Goldbloom	Added, introductory information to orient the reader : "Why are we doing this"and"Origins & Evolution" - this was done with Steph Sutherland and Jim Bottomly . Completed full review, making edits for clarification. Removed cell comments and used notes section and cell highlighting to flag important changes and questions for the larger group. Moved Sub-domain definitions into Companion document.
1.16	2021-07-16	Ellen Goldbloom	incorporated SS suggestions and highlighted questions for group
2			Distributed to the group for revie of flagged questions and final changes to individual sections.
2.1-2.2	2021-09-01	CM, PC, CED, JL, LF, EG, TRS, CZ,	health outcomes, health delivery, individual experience groups met to review comments and address or add.
2.3	2016-10-08	Catherine Dulude	compiled revisions into final draft framework removed all highlights that were not commented on and leaving only un-resolved notes
3	2021-10-16	Catherine Dulude	Full review and re-structured excel document
3.1 - 3.13	2021-12-17	All	CED & SS facilitated additional meetings with small groups to review comments and finalize Sub-domains, examples, indicators and data sources. Health Outcomes 3 meetings + review and contributions by email, Health Delivery 3 meetings + review/contributions by email, Program IMplementation, 2 meetings + review / contributions by email, initial discussion with Christine Kouri - EDII Lead
3.14	Dec 21,2021	All	Overall Consensus on framework, moved some sub-sections around, feedback from EDII and some adjustments required to Progrma Implementation (present first), specific followup for program implementation team. Next steps Diabetes examples
3.15	2021-12-22	Ellen, Shelley, Catherine (Steph)	Work through framework to flesh out Diabetes examples
3.17	2022-01-01	Catherine + Health Outcomes Group (Paula, Heather, Claudia, Natalie) + Justyna	more specific examples, discussion of importance of calling out behavioural concerns with example question and sub-domain title.
3.18	2022-01-01	Catherine + Karen	revised Program implementation questions, Karen followed up with example metrics & data sources
3.21	February, 2022	Ellen, Catherine, Caroline	Diabetes example - new tab
3.23	2022-04-27	Catherine	Revisions based on new information (for review by team) and formatting for manuscript appendix.

## Sheet: Purpose
Virtual Care Evaluation Framework					Notes
Why are we doing this	It is critical to monitor both the performance of telehealth programs, creation of new telehealth programs and how existing programs change. This ensures care is delivered in manner consistent with standards of in-person patient care. Although a few measurement standards exist to guide the assessment of telehealth’s impact on the care delivered, current literature lacks a unified approach to eval…				No comments made to this section during the Sept review, therefore assume approved by working group and ready for external review
Origins & Evolution	Adapted and modified from AAP (Chuo, 2020). Reframed for canadian pediatric context beyond COVID-19 and include practical examples that suport use. Augmented or added elemnts from HQO, technology Usability Questionnaire, ++
Intended users of this framework	Primary Users (people who plan, conduct and use results of an evaluation)	Secondary Users (people at other organizations who might be interested in using this tool to evaluate their own virtual care services/programs)	Tertiary Users (oversight and funding agencies)
Who are we designing this tool for?	CHEO Departments and Division Clinical or Operational Leadership (Directors, Managers, Service Providers), Clinical Investigators,	Other Hospitals, Health Authorities,	Funding bodies, e.g. MOH

## Sheet: Graphic
		CHEO's Pediatric Virtual Care Evaluation Framework
																	Notes from Dec 21, 2021 Meeting
																	Consensus on framework as presented
																	Important not to have a relational diagram (Steph)
																	Individual Experience with virtual care program

## Sheet: VC Eval Framework
Virtual Care Evaluation Framework
Domain	Sub-domain/thematic areas	Major Evaluation Questions Below are example questions that could be asked within each sub-domain. When developing or evaluating a program it is important that evaluation questions speak directly to program objectives <see companion document>	Potential Measures/Indicators Examples of what you could measure to answer this question.	Data Sources All potential data sources for identified indicators regardless of whether or not you have access to or currently collect these data.	Data Collection Strategy How data will be collected: database/doc review, qualitative, quantitative, etc.	Basis of Comparison For example, other virtual care programs, provincial guidelines, in-person program/control group, etc.)
Health Outcomes
	Physical	What is the impact of virtual care on individual physiological/clinical measures of health?	Diabetes patient's hemoglobin A1C (e.g., value, % within target), BMI (e.g., within normal range), mortality, surgical site infection (SSI; e.g., infection occurrence, frequency, rate) Complex care pain scores (child or parent proxy, e.g., linear visual analog scale, feeding/swallowing performance)	Patient charts	Quantitative, surveys	Data registries, literature
		What is the impact of virtual care on population level physiological/clinical measures of health?	Children/Youth with diabetes: Hemoglobin A1C (e.g., % of patients with A1C within target), BMI (% of patients with BMI SDS >3; % of patients with increase in BMI SDS), Surgical patients: SSI (% of patients with SSI), mortality		Chart review, reporting tools, quantitative	Regional or provincial data registries (e.g., Canadian Institute of Health Information), established patient registries, literature
	Mental & Behavioural	To what extent does virtual in-home assessment/treatment address the mental health needs of patients (and/or caregivers)? E.g. for very young patients or patients with neurological disabilities parent MH evaluation is critical	Patient self-reports: (e.g., Child Depression Inventory (CDI) (1); Multidimensional Anxiety Scale for Children 2 (MASC 2) (2); Youth Self-Report (YSR) Questionnaire (3) Caregiver reports: (e.g., Child Behaviour Checklist (CBCL) (3), Strengths and Difficulties Questionnaire (SDQ) (4)) Clinician reports: (Children’s Global Assessment Scale (CGAS) (5); HEADS-ED (6)) Caregivers evaluation: (Edinburgh…		Quantitative	Literature, clinical normative data
		To what extent does virtual care address the needs of patients with behavioural concerns?	CBCL (Child Behavior Checklist) (3); YSR (Youth Self Report) (3), TRF (Teacher Report Form) (3), behaviour data tracking (frequency, intensity, duration, etc.)		Quantitative	Clinical benchmarks, clinical normative data
		What is the impact of virtual care on population level psychological measures of health?	Proportion of clients within clinical range	Patient charts, program benchmarks, clinical norms	Quantitative	Literature, clinical normative data
	Quality of Life	What is the impact of vitual care programs on health-related quality of life for patients (or caregivers)? (e.g., how do patients being followed virtually score on quality of life scales compared to patients being seen in-person)	Patient self-reports, caregiver reports, other comprehensive measures of QOL, including general QOL scales (e.g., Diener’s Satisfaction with Life Scale (SWLS) (10), KIDSCREEN subscale for Feelings (11))	Patient charts	Quantitative	Community data, clinical normative data
Health Delivery
	Access (timeliness & equity)	How does virtual care compare to in person care with regard to timely access to care (time between need identified/requested and care delivered)?	ED wait time, time to access sub specialty (e.g. mental health, radiology)	EHR	Quantitative	Provincial reports, in-person visits
		Is the program accessible to all patients/families? If not, what are the barriers to access?	Patient/caregiver and provider perceptions, % visits conducted (or supported via translation) in patients preferred language/visit type, Deprivaton Indices (DI) to measure population being served by virtual care vs in-person program (e.g., % no-show; # of virtual visits/# of total visits among patients from different income levels/DI quintiles)	EHR, patient/caregiver surveys & targeted interviews	Quantitative & qualitative	Other clinics within hospital or with other hospitals; in-person visits
		How does virtual care increase or decrease equity gaps compared to in-person visits?	% visits conducted (or supported via translation) in patients preferred language/visit type, Deprivaton Indices (DI) to measure population being served by virtual care vs in-person program (e.g., % no-show; # of virtual visits/# of total visits among patients from different income levels/DI quintiles)	EHR, patient/caregiver surveys & targeted interviews	Quantitative & qualitative	In-person visits
		Are processes in place to address barriers to access with regard to virtual care? (e.g., computer literacy, language barriers, family situation, financial situation)	# of technology reports, difference in social determinants of health (e.g., language barriers, virtual ER, provider perceptions, literacy barriers, finanical barriers, self directed online patient registration portals)	Provider surveys, family interviews via waiting room	Quantitative & qualitative
	Privacy	To what extent do patients feel comfortable sharing openly with their provider during virtual visits? (e.g., as a function of the patient or provider's home/work environment)	Patient and provider perception	Patient/provider surveys	Post-visit questionnaire	Literature review, other virtual care programs (e.g., mental health), in-person surveys
		To what extent can we adhere to privacy and confidentiality standards?	Reported privacy breaches, privacy impact assessments, provider surveys	Safety reporting system, privacy breaches, privacy office audits/assessments	Quantitative	National/organizational privacy standards
	Safety	Does virtual care introduce safety risks? (e.g., how frequently is there a missed diagnosis due to limitations of a virutal encounter)	Safety reports (e.g., inappropriate modality, missed diagnosis or inappropriate prescription) where limitations of virtual care identified as root cause or contributing factor, safety events linked to virtual care, # of safety reports for virtual vs. in-person care of same patient population; % of unanticipated ED visits, mobility and mortality rounds, Canadian Pediatric Surveillance Program repo…	EHR, internal and external databases and reporting systems	Quantitative	Provincial/national data, benchmarks or guidelines
	Efficiency (time and resources)	To what extent is there a cost difference to the organization/providers to deliver virutal care compared to in person?	Time and financial resources allocated for: booking patients, adapt the computers/new IT equipment, hire clerks, IT support, visit duration, billing, etc. # of encounters/family with virtual vs. in-person model, # referrals to in-person ED from virtual ED, # visits in place of vs. in addition to in-person	EHR (virtual care dashboard), # of IT support requests, cost of IT equipment purchased for virtual care, billing records	Quantitative
		To what extent is there a cost difference to patients/caregivers to receive virutal care compared to attending an in person visits?	Cost of internet provision, phone, computer, skill acquisition vs. travel costs (e.g., parking) and missed work or lost wages, travel time (distance from home to clinic), wait time (virtual vs. in-person waiting room)	Patient/provider surveys, interviews	Quantitative & qualitative
		Are virtual visits more/less efficient time-wise for providers and/or patients and caregivers compared to in person visits?	Clinic wait time, visit duration, # of ED visits (throughout), # of MH ED visits (throughout), patient and provider perceptions	EHR, patient/provider surveys	Quantitative & qualitative	In-person program, cost models
	Effectiveness	How well is the virtual care program delivering the care as intended (in terms of quality and quantity)?	% adherence to clinical practice guidelines (e.g., A1C should be measured 3 times per year), ability to deliver standard of care or health surveillance guidelines for patient population (e.g., ability to adhere to AAP Health Supervision Guidelines for Trisotomy-21 (12)), ability to adhere to best practices (e.g., core components of family centered rounds), ability to complete age appropriate or r…	EHR, audit and feedback mechanisms, provider surveys	Quantitative	Administrative health databases (e.g., Institute for Clinical and Evaluative Sciences (IC/ES)), in-person programs, other hybrid programs at other institutions
		How do virtual vists compare to in person pt. encounters with regard to return visit frequency?	Return visit frequency for related problem within time marker (e.g., 3 weeks) after virtual vs. in-person visits	EHR patient chart	Quantitative	Return visit frequency within time marker after in-person visits
		In which circumstances (if any) are virtual visits more or equally as effective as in-person visits?	Patient population and care needs (e.g., need for physical exam or physical interaction to effectively diagnose or treat), patient, caregiver and provider perceptions of effectiveness of virtual encounter vs in person visit, contextual considerations / external factors thatimact appropriateness of inperson or virtual care (e.g., times of high infectious risk and/or need for high personal protecti…	Patient portal, EHR, patient/provider surveys, nursing perceptions	Quantitative & qualitative
Individual Experience (patient, caregiver, provider, support staff)
	Usefullness	How useful do participants perceive health care delivered virtually is, as compared to traditional in-person encounter?	Patient/provider perception			Literature, benchmark against established / comparable telehealth programs
	Ease of use (of the telehealth service / technology used to deliver it)	To what extent is the process for booking virtual care services easy to use?	Proportion of participants who felt booking virtual care was easy to use, # of deviations from standard booking process	Post-encounter questionnaires, patient/provider experience surveys, clerk experience surveys, support calls, EHR	Qualitative & quantitative	Satisfaction with in-person booking process
		To what extent is the method of connecting (to patient/provider) easy to use?	Participant perceptions (patients, caregivers, providers), # of reported errors, # of support calls	Post-encounter questionnaires, patient experience surveys	Qualitative & quantitative	Literature, benchmark against established/comparable telehealth programs
	Interaction Quality	Is the quality of the patient/provider interaction supported by virtual care technology sufficient?	Participant perception (patients, caregivers, providers), # support calls	Post-encounter questionnaires, patient experience surveys, support logs
	Technology Reliability	How reliable is the technology used to deliver virtual care?	% visits with/without technology issues, number of appointments cancelled due to technical difficulties		Qualitative & quantitative
	Satisfaction & future use	How satisfied are participants with vitual care access/availability?	Measurement of patient experience, measurement of caregiver experience, participant perception (provider or patient/caregiver), net promoter score (measure of customer satisfaction)	Patient, staff satisfaction surveys, # of complaints, # of compliments	Surveys	Satisfaction scores with in-person care, internal and external virtual care programs
		How satisfied are users with the telehealth service overall?
		How willing would users be to use this system in future?
	Patient Centeredness	To what extent does care delivered virtually meet individual needs? (e.g., is the patient able to receive care in the way that is most convenient for them?; is the patient able to receive care with the family members/supports they require?)	Survey questions about patient-centredness (decision making, felt concerns were heard, offered choice)	Surveys
	Workload Burden	Patient/caregiver level - To what extent is patient burden impacted by the virtual care delivery mechanism?	# workdays or missed school days due to health appointments; reported anxiety/burden/distress	Surveys
		Provider level - To what extent is the format of care provision impacting provider wellness?	Physician Work Life Study single-item measure (13), Stanford Professional Fulfillment Index (14), Well-Being Index (15), Maslach Burnout Inventory (16), Oldenburg Burnout Inventory (17)	Surveys
Program Implementation (in place or hypothesized program)
	Leadership	Are leadership and key stakeholders adequately engaged? (e.g., supporting appropriate prioritization at the organization level, clear communication strategy & change management plan)	Participant perception, evidence of organizational prioritization or communication to organization, financial support from the organization,clear expecation being set, monitored and supported, presence of goverance structure, evidence of delayed decision making, program appears on corporate structure or priority list	Policy, governance structure, surveys, reporting	Qualitative & quantitative	Other programs funded by healthcare funding agencies or payers (e.g., Ontario Health)
		Is there clear governance and an escalation path?	Presence of governance structure with terms of reference	Decision matrix, escalation diagram	Qualitative & quantitative	Other programs funded by healthcare funding agencies or payers (e.g., Ontario Health)
		Was adequate policy or guidance provided for program delivery? (e.g., when to choose virtual, patient pop, practice standards, no exam required)	Surveys, resource material available	Surveys	Qualitative & quantitative	Other programs funded by healthcare funding agencies or payers (e.g., Ontario Health)
	Resources (human and financial)	Were the human resources provided adequate to support program needs? (e.g., physician, nurse, interpreter, health professional, admin support, etc.)	Provider and family surveys, needs assessments, any other indicators of resource need met or unmet	Surveys	Qualitative & quantitative	Other similar programs
		Was appropriate funding secured to support and sustain the change (e.g., appropriate long term operational funding model)?	Operational budget approvals for resources, cost under/overrun	Budget trackers, audits	Quantitative	Other similar programs
	Training & Support	Are training and support resources clear, comprehensive and kept up to date? (e.g., provider, patient/caregiver and staff trianing resources)	Observation of workflows, process for maintenance of training and support material	Surveys, focus groups, feedback from Family and Youth Advisory Groups	Qualitative & quantitative	Other similar programs
		Are training materials and support services accessible? (e.g., easy to find, avialable in multiple languages, meets accessibilty standards)	Perceived ease of access, website traffic, adherence to accessiblity compliance standard	Focus groups, surveys, third party review, web traffic metrics	Qualitative & quantitative	Applicable regional guidelines for accessibility
		Is ongoing support in place for providers, patients, caregivers and staff? (e.g., super users, issue management process)	Surveys of providers, staff, families	Surveys, error/use rate	Qualitative & quantitative	Other similar programs
	Infrastructure & Technology (functionality, performance, security)*	To what extent has cybersecurity been reviewed and considered? (e.g., has a threat risk assessment been conducted?)	# of access issues, adherence to cybersecurity standards, # of threats or security breaches	Cyberreview by 3rd party, threat risk assessment, cybersecurity monitoring tools	Quantatative	Applicable regional or national security guidance or directives (e.g., Canadian Centre for Cybersecurity guidance & directives)
		Do providers and/or patients have appropriate access to information required to support care delivery? (e.g., access to whole patient chart, ability to communicate with other providers, or provide followup information to patients)	Surveys to providers, staff, patients/families, safety reporting system, # of release of information requests	Surveys	Qualitative & quantitative	Other similar programs
		To what extent does the technology support virtual care service delivery?	% planned/unplanned downtime, # of requests for change/optimization, volume of technical issues, needs assessment/requirements evaluation	HelpDesk tickets/IT reports, project intake/enhancement requests, post-encounter questionnaires	Quantitative	Other similar programs
	*note privacy is under health delivery
