# Supplementary material for: A pediatric virtual care evaluation framework and its evolution using consensus methods
Source: BMC Pediatr. 2023 Aug 17;23:402. doi: 10.1186/s12887-023-04229-1 (PMC10433580; doi:10.1186/s12887-023-04229-1)
Supplement: Supplementary file 3 — Additional file 3. Example Virtual Care Evaluation Plan for Type 1 Diabetes clinic, integrated EHR context. [file 12887_2023_4229_MOESM3_ESM.xlsx]

## Sheet: Revision log
Revision log:	Files will be named according to the version control system discussed at the May 11th meeting, but this log will document further details of changes made to each version
Version #	Date	Edits made by	Comments
	2021-05-08	Various	To date, various comments and edits were made by several members of the committee, including significant input from Claudia Malic and Steph Sutherland. From this point onwards, specific changes will be tracked in this log.
1.2	2021-05-09	Individual Experience Sub-group	Catherine, Justyna and Ellen revised the Individual Experience section. The "Anticipated Data Source" was also deleted, merged with New Data source.
1.6	2021-06-03	Steph Sutherland	Met with smallgroups, one per section and compiled revisions. Items that still need attention are (in no particular order): -Effectiveness needs to be operationalized (in the context of a question) -Under 'Basis of Comparison' you will see Provincial Reports a lot. If there is a name (if such a report exists) it should be used -(row 23) I moved one of Catherine's group suggestions (I combined row…
1.7	2021-06-04	Catherine Dulude	Review and structural changes to support clarity.
1.9	2021-06-16	Ellen Goldbloom	Health Outcomes: added common physiologic health outcomes and defined as individual and population level and provided specific examples; removed "pts needing to be hospitalized for testing positive for covid as neither CD nor I understood how this fit wrt VC; changed the asthma control example significantly (made major question less specific but examples more specific and removed patient and prov…
			Health Care Delivery - moved several items from health outcomes to this section; refined questions and measures for effectiveness; separated privacy into 2 separate questions; removed clinic wait times from timeliness section as this is efficiency (added to that section); added equity question; I think we can rework the conssitency/approp one into effectiveness
			Individual exp - removed burden/benefit row that was pulled from health outcomes and divided it up into other sections - explicitly put it in patient centeredness; added net promotor score (from STEM); added details to patiennt centeredness; added staff wellness and burnout, question about usability (overall c/w in person... not just of tech)
			Progarm Imp - added KPI
1.12	2021-06-22	Karen Macaulay	Added information for Prgram Implemenation
1.13-1.15	2021-07-07	Catherine Dulude, Ellen Goldbloom	Added, introductory information to orient the reader : "Why are we doing this"and"Origins & Evolution" - this was done with Steph Sutherland and Jim Bottomly . Completed full review, making edits for clarification. Removed cell comments and used notes section and cell highlighting to flag important changes and questions for the larger group. Moved Sub-domain definitions into Companion document.
1.16	2021-07-16	Ellen Goldbloom	incorporated SS suggestions and highlighted questions for group
2			Distributed to the group for revie of flagged questions and final changes to individual sections.
2.1-2.2	2021-09-01	CM, PC, CED, JL, LF, EG, TRS, CZ,	health outcomes, health delivery, individual experience groups met to review comments and address or add.
2.3	2016-10-08	Catherine Dulude	compiled revisions into final draft framework removed all highlights that were not commented on and leaving only un-resolved notes
3	2021-10-16	Catherine Dulude	Full review and re-structured excel document
3.1 - 3.13	2021-12-17	All	CED & SS facilitated additional meetings with small groups to review comments and finalize Sub-domains, examples, indicators and data sources. Health Outcomes 3 meetings + review and contributions by email, Health Delivery 3 meetings + review/contributions by email, Program IMplementation, 2 meetings + review / contributions by email, initial discussion with Christine Kouri - EDII Lead
3.14	Dec 21,2021	All	Overall Consensus on framework, moved some sub-sections around, feedback from EDII and some adjustments required to Progrma Implementation (present first), specific followup for program implementation team. Next steps Diabetes examples
3.15	2021-12-22	Ellen, Shelley, Catherine (Steph)	Work through framework to flesh out Diabetes examples
3.17	2022-01-01	Catherine + Health Outcomes Group (Paula, Heather, Claudia, Natalie) + Justyna	more specific examples, discussion of importance of calling out behavioural concerns with example question and sub-domain title.
3.18	2022-01-01	Catherine + Karen	revised Program implementation questions, Karen followed up with example metrics & data sources

## Sheet: Purpose
	Virtual Care Evaluation Framework					Notes
	Why are we doing this	It is critical to monitor both the performance of telehealth programs, creation of new telehealth programs and how existing programs change. This ensures care is delivered in manner consistent with standards of in-person patient care. Although a few measurement standards exist to guide the assessment of telehealth’s impact on the care delivered, current literature lacks a unified approach to eval…				No comments made to this section during the Sept review, therefore assume approved by working group and ready for external review
	Origins & Evolution	Adapted and modified from AAP (Chuo, 2020). Reframed for canadian pediatric context beyond COVID-19 and include practical examples that suport use. Augmented or added elemnts from HQO, technology Usability Questionnaire, ++
	Intended users of this framework	Primary Users (people who plan, conduct and use results of an evaluation)	Secondary Users (people at other organizations who might be interested in using this tool to evaluate their own virtual care services/programs)	Tertiary Users (oversight and funding agencies)
	Who are we designing this tool for?	CHEO Departments and Division Clinical or Operational Leadership (Directors, Managers, Service Providers), Clinical Investigators,	Other Hospitals, Health Authorities,	Funding bodies, e.g. MOH

## Sheet: Graphic
		CHEO's Pediratric Virtual Care Evaluation Framework
																	Notes from Dec 21, 2021 Meeting
																	Consensus on framework as presented
																	Important not to have a relational diagram (Steph)
																	Individual Experience with virtual care program

## Sheet: VC Eval Framework
Virtual Care Evaluation Framework							Note: PLEASE READ CONTENTS OF ROWS 2 - 8
Why are we doing this		It is critical to monitor both the performance of telehealth programs, creation of new telehealth programs and how existing programs change. This ensures care is delivered in manner consistent with standards of in-person patient care. Although a few measurement standards exist to guide the assessment of telehealth’s impact on the care delivered, current literature lacks a unified approach to eval…					Virtual Care will be defined in the companion document. Virtual Care and Telehealth are the most appropriate terms used in literature (providing care, at a distance using technology) - may need to re-do this analysis once framework finalized. Items in italics are not in AAP STEM framework (we will probably have to cross -ref again at the end) Items in bold - sub-domains align with HQO Quality Ele…
Origins & Evolution		Adapted and modified from AAP (Chuo, 2020). Reframed for canadian pediatric context beyond COVID-19 and include practical examples that suport use. Augmented or added elemnts from HQO, technology Usability Questionnaire, CHI BE Framework ++
Intended users of this framework		Primary Users (people who plan, conduct and use results of an evaluation)	Secondary Users (people at other organizations who might be interested in using this tool to evaluate their own virtual care services/programs)	Tertiary Users (oversight and funding agencies)
Who are we designing this tool for?		CHEO Departments and Division Clinical or Operational Leadership (Directors, Managers, Service Providers), Clinical Investigators,	Other Hospitals, Health Authorities,	Funding bodies, e.g. MOH
					Do data sources currently exist @CHEO?
Domain	Sub-domain/Thematic Areas	Major Evaluation Questions Below are example questions that could be asked within each sub-domain. When developing or evaluating a program it is important that evaluation questions speak directly to program objectives <see companion document>	Potential Measures/Indicators Examples of what you could measure to answer this question.	Data Sources (all potential data sources for identified indicators regardless of whether or not you have access to or currently collect this data) - TA consider flagging *traditional metrics vs novel virtual care metrics	YES We have the following data sources	NO What data sources do we need to develop?	Data Collection Strategy How data will be collected: database/doc review, qualitative, quantitative, etc.	Basis of Comparison (E.g. other virtual care programs, provincial guidelines, in-person program, etc)	Notes (Each sub-group is responsible for addressing the comments /notes for their section and bringing outstanding questions/key points forward for review or discussion and consensus by the larger group). Please remove all highlights and comments leaving only the final text in the framework - use this column (Notes) to explain changes / decisions made and rationale as required.
Health Outcomes
	Physical	What is the impact of virtual care on individual physiological/clinical measures of health? i.e. measures of physiological function, signs and symptoms, labrotory (and other scientific) measures relating to the function of major organ systems, the extent of disease or disability and the provision and/or response to therapeutic interventions.	Diabetes patient's Hemoglobin A1C (e.g. value, % within target), BMI, Mortality, SSI (e.g. surgical site infection occurrence, frequency, rate) Weight (e.g. within normal range), Complex care pain scores (child or parent proxy, e.g. Linear VAS), feeding and swallowing performance	Patient charts	Yes, EHR data warehouse		Quantitative (data warehouse), surveys	CIHI registries, regional or provincial data registries, established patient registries, literature	SS: need examples to bound this evaluation question - see CED suggestions in column C in purle = definition of physiological outcomes. consider this source https://www.comet-initiative.org/Resources/OutcomeClassification and https://www.comet-initiative.org/assets/downloads/Taxonomy%20explanation%20table%202018.10.30.pdf EBG: Would like to have Dhena R have a look to see what we can capture with …
		What is the impact of virtual care on population level physiological/clinical measures of health?	Children/Youth with diabetes: Hemoglobin A1C (e.g., % of patients with A1C within target), BMI (% of patients with BMI SDS >3; % of patients with increase in BMI SDS), Surgical patients: SSI (% of patients with SSI), mortality		Yes, EHR but need to build new reporting fields, Caboodle		chart review, reporting tools, quantitative	CIHI registries, regional or provincial data registries, established patient registries, literature
	Mental & Behavioural	To what extent does virtual in-home assessment/treatment address the mental health needs of patients (and/or caregivers)? E.g. for very young patients or patients with neurological disabilities parent MH evaluation is critical	Patient self-reports, (e.g., Child Depression Inventory (CDI); Multidimensional Anxiety Scale for Children 2 (MASC 2); Youth self-report (YSR)) caregiver reports (e.g., Child Behaviour Checklist (CBCL), clinician reports (e.g., Children's Global Assessment Scale (CGAS); HEADS-ED) e.g. for Addictions CRAFFT 2.1 +N (https://crafft.org/get-the-crafft/) or GAIN-SS (https://gaincc.org/instruments/) E.…		Yes. RCADS (youth self-report anxiety/depression), ASQ (Ask Suicide Questions); Strenghts and Difficulties Questionnaire (SDQ; self/caregiver report); currently working on getting some of these into EHR	We do not have post-treatment quesionnaires for most services; no clinician reports, need to develop more in EHR Patient Portal	Quantitative	Other hospitals, literature, Community/Clinical normative data	EBG: Would there be any comparative data for patients seen in-person? If yes indicate in Basis for Comparison column. It is very likely that the CHEO MH services will continue to offer virtual services beyond COVID, so this is possible_but no longer possible for virtual MH services provided in the ED_PaulaC LF: What about MH as an outcome of VC mechanism, not just for MH patients. e.g. to what ex…
		To what extent does virtual care address the needs of patients with behavioural concerns?	CBCL (Child Behavior Checklist); YSR (Youth Self Report), TRF (Teacher Report Form), Behaviour Data Tracking (frequency, intensity, duration, etc.)		Intake measures in Mental Health Clinics	Routine collection of follow-up and exit assessments	Quantitative	Clinical benchmarks,	Cloutier, Paula: I would eliminate this row as it fall under mental health generally. Behavioral health is the term americans use for mental health. Examples of these measures are inclued above. [CED after some discussion and consult with Autism representative team decided to keep and highlight behavioural for clarity re inclusion of behavioual programs and services and considerationas]
		What is the impact of virtual care on population level psychological measures of health?	Proportion of clients within clinical range	Patient charts, program benchmarks, clinical norms		Ensure scored measures are captured in EHR and reported out with comparison to clinical cut-offs /benchmarks (e.g. determine average score/population and compare against clinical norms or scores for virtual vs inperson)	Quantitative	literature, normative data
	Quality of Life	What is the impact of vitual care programs on health-related quality of life for patients (or caregivers)? E.g. How do patients being followed virtually score on quality of life scales compared to patients being seen in-person?	Self-report /caregiver reported outcome meausres (PROMs - Patient Reported Outcome Measures). Patient self-reports, caregiver reports. Other comprehensive measures of QOL, including genreal QOL scales (e.g Diener’s highly validated Satisfaction with Life Scale (SWLS) (5 items) (32, 33). or specific QOL scales (eg Parent stress index (Abidin), the KIDSCREEN survey subscale for Feelings (28,29)) th…	Patient charts	None	Routine collection via patient portal	Quantitative	Community data, clinical normative data	EBG: Under Data Sources, need to include specific examples of validated survey tools; please suggest some Cloutier, Paula: I removed PROMS because more people will understand self-reports and not sure why we would introduce PROMS . I would also remove all the extra details that are in this section. E.g, not the place to get into validity and particular sub-scales. NOTE for paper QoL mental and ph…
Health Delivery
	Access (timeliness & equity)	How does virtual care compare to in person care with regard to timely access to care (time between need identified/requested and care delivered)?	ED wait time, time to access sub specialty (e.g. mental health, radiology)	EHR	Yes		Quantitative	Provincial reports; in person?	EBG: Can we identify specific provincial reports for comparison? ED? MH? Surgery? TA: I don't have an answer for this one but happy to ask around if none of us do.
		Is the program accessible to all patients/ families? If not, what are the barriers to access?	Patient/caregiver and provider perceptions, % visits conducted (or supported via translation) in patients preferred language/visit type, Deprivaton Indices (DI) to measure population being served by virtual care vs in-person program (e.g., % no-show; #VV/#total Visits among patienst from different income levels/ DI quintiles)	EHR, patient/caregiver surveys & targetted interviews	EHR but need to build new reporting fields IT reports, booking numbers	Patient/caregiver surveys & interview protocol	Quantitative & qualitative	Other clinics within hospital or with other hospitals; in person visits
	(equity)	How does virtual care increase or decrease equity gaps compared to in-person visits?
		Are processes in place to address barriers to access with regard to virtual care (e.g. computer literacy, language barriers, family situation, financial situation)?	# of technology reports, difference in Social Determinants of Health, eg. language barriers, virtual ER, provider perceptions, literacy barriers, finanical barriers, self directed online pt registration porals,	Care provider survey, family interview via waiting room		Care proivder survey, family survey	Quantitative & qualitative
	Privacy	To what extent do patients feel comfortable sharing openly with their provider during virtual visits? e.g. as a function of the patient or provider's home/work environment.	patient and provider perception	patient / provider surveys	patient experience reports, patient satisfaction surveys (select programs)	Standardized patient satisfaction survey across programs,	post-visit questionnaire	literature review, other virtual care programs (e.g. metnal health), in-person survey	EBG: does this fit here or ind exp? SS, LF and CED feel it fits better here in health delivery.
		To what extent can we adhere to privacy and confidentiality standards?	Reported privacy breaches, Privacy Impact Assessment (PIA), provider surveys	Safety Reporting System, Privacy breaches, Privacy office audit / assessments			quantitative	national / organizational privacy standards	EBG: part of safety or its own thing? See SS's comment about possible duplicate question; I think it's different because one is patient perception, one is measured breaches (different perspectives) but could combine to one questions and differentiate with examples of measures... thoughts? CZ: I also see the distinction - one as patient perception and the other adhering to actual privacy standards…
	Safety	Does virtual care introduce safety risks? E.g. How frequently is there a missed diagnosis due to limitations of a virutal encounter?	Safety reports (e.g. inappropriate modality, missed diagnosis or in appropriate prescription) where limitations of virtual care identified as root cause or contributing factor, Safety events linked to virtual care, # Safety reports for virtual vs in-person care of same patient population; % of unancticipated ED visits (AAP-STEM says = # VV with unanticipated, subsequent ED visits/# VV), M&M (Mobi…	EHR, Internal and external databases and reporting systems	Yes		Quantitative	Provincial/National data, benchmarks or guidelines	EBG: Can someone think of another example here? Natalie? Would be great to have an example of a missed dx like no abx for infection… bad example… (AAP-STEM has one re: URTI and no abx) MB: Could link an example of misdiagnosis due to a lack of physical exam (ie. otitis media - treat with abx because of "ear pain" on history, but pt doesnt actually have AOM on physical exam - which you didn't do -…
	Efficiency (time and resources)	To what extent is there a cost difference to the organization/providers to deliver virutal care compared to in person?	Time and financial resources allocated for : booking patients, adapt the computers / new IT equipment, hire clerks, IT support, visit duration, billing, etc. # of encounters / family with virtual vs. in-person model, # referrals to ED from VCED, # visits in place of vs in addition to in person,	EHR (virtual care dashboard), # of IT support requests, cost of IT equipment purchased for Virtual Care, billing records	Yes, event tracking, need to build new fields in EHR	time stamp fucntion for workload measurement for all user groups	Quantitative		In Manuscript highlight the importance of evaluating ovreall cost-effectiveness or cost-benefit, see notes from Prog. Implementation team. Is this in the companion document as an explanation of the section as a whole? articulate as a concept here or in companion doc.
		To what extent is there a cost difference to patients/caregivers to receive virutal care compared to attending an in person visits?	cost of internet provision, phone, computer, skill acquisition vs travel costs (e.g. parking) and missed work or lost wages, travel time (use km from home to clinic/hosp to calc time and dollars saved), wait time (in virtual vs in-person waiting room),	patient/provider survey, interviews	Yes, Patient Portal (e.g. MyChart), EHR	patient/provider survey or interviews	Quantitative & qualitative		in manuscript call-out organization/ provider level vs patient & caregiver
		Are virtual visits more/less efficient time-wise for providers and/or patients and caregivers compared to in person visits?	clinic wait time, visit duration, # ED visits (throughput), # MH ED visits (throughput), patient and provide perceptions	EHR, patient/provider surveys	EHR,possible but not well captured		Quantitative & qualitative	in-person program, cost-models	CED: (moved comment) need to figure out what throughput means in terms of funding models and overall efficiency if this is something that is looked at corporately and provincially
	Effectiveness	How well is the virtual care program delivering the care as intended (in terms of quality and quantity)?	% adherence to clinical practice guidelines, e.g. A1C should be measured 3 times / year - does the virtual model support that? Ability to deliver standard of care, or health surveillance guidelines for your patient population, e.g. ability to adhere to Health Supervision Guidelines for Trisotomy-21 from AAP Ability to adhere to best practices e.g core components of family centered rounds. Ability…	EHR, Audit and feedback mechanisms, provider surveys,	Yes, EHR (e.g. lab reports, flowsheets) best practice advisory overrides with the reason of unable to perform.	May need to buildnew reporting fields or flowsheets	Quantitative	ICES, In-person programs, other hybrid programs at other institutions	EBG: Does "throughput" examples of potential measures/indicators fit better here or in Program Implementation domain? CZ: or efficiency? CED: agree with Caroline to move throughput examples to Efficiency section below. But need ED input...is the question: as a function of staffing resources does VC contribute to overall higher throughput? # ED visits (throughput), # MH ED visits (throughput) - ne…
		How do virtual vists compare to in person pt. encounters with regard to return visit frequency?	Return visit frequency for related problem within time marker (e.g. 3 weeks ?) after virtual vs in-person visits	EHR patient chart	Yes, EHR but need to build new reporting fields	Patient/provider perceptions	Quantitative	Return visit frequency within time marker after In person visits	EG what about broadening the question, e.g. : How to vv compare to in person wrt effectively addressinghealth care need? Need to justify quant and qual measures. Agree w Caroline's comments in blue. CED: I think return to ED frequency could be a good indicator of effectiveness for some programs esp if compared to the return to ED frequency of in-person delivery of the same care / visit type. Perh…
		In which circumstances (if any) are virtual visits more or equally as effective as in-person visits?	Patient population and care needs, e.g. need for physical exam or physical interaction to effectively diagnose or treat, patient, caregiver and provider perceptions of effectiveness of virtual encounter vs in person visit, contextual considerations / external factors thatimact appropriateness of inperson or virtual care, e.g. times of high infectious risk and/or need for high PPE use to do in-per…	Patient portal, EHR, patient/caregiver survey, provider survey, nursing perceptions	Yes	patient/caregiver survey, provider survey, nursing focus group protocol	Quantitative & qualitative		EBG: moved from efficiency section
Individual Experience (patient, caregiver, provider, support staff)									CED 09Aug: Need to consider clerical /support staff as well - not just Ind Exp section , throughout framework and be explicit in companion doc. Have reviewed and added comments in purple where appropriate.
	Usefullness	How useful do participants perceive health care delivered virtually is, as compared to traditional in-person encounter?	patient/provider perception E.g SCALE		Post-encounter questionnaires/ Patient Experience survey	post encounter questionnaires, patient experience survey		Literature, benchmark against established / comparable telehealth programs,	09Aug Revised question for clarity
	Ease of use (of the telehealth service / technology used to deliver it)	To what extent is the process for booking telemedicine services easy to use?	Proportion of participants who felt booking telemedicine was easy to use, #deviations from standard booking process,	Post-encounter questionnaires/ Patient Experience survey, Proider experience survey, clerk experience survey, support calls, EHR	post-visit questionnaires (service / visit-specific), patient experience survey	observation, interviews, standardized post-visit questionnaires,	qualitative & quantitative	satisfaction with in-person booking process	STEM identifies "usability" as example with "difficulty getting to appt (either traveling or connecting - tech diff)… here we have broken that sub-domain down into more granualr components based on the definition of usability and conponents identified in validated survey tools including the telehealth usability questionnaire. <see companion doc>
		To what extent is the method of connecting (to patient/provider) easy to use?	Participant perceptions (patients, caregivers, providers), # reported errors, # support calls	Post-encounter questionnaires/ Patient Experience surveys	post-visit questionnaires (service-specific), EHR, IT reports	standardized post-visit questionnaires, observation, interviews	qualitative & quantitative	Literature, benchmark against established / comparable telehealth programs,	CED 06Aug: I would like to highlight - in the companion document? - the importance of evaluating these items in the context of identified needs, capabilities and environment of telemedicine users (patients, caregivers, providers, etc.) ie. to evaluate these elements first requires understanding who your users are and a needs assessment to establish requirements, capabilities and characteristics o…
	Interaction Quality	Is the quality of the patient/provider interaction supported by VC technology sufficient?	Participant perception (patients, caregivers, providers), # support calls	Post-encounter questionnaires/ Patient Experience survey, support logs	Virtual Care Clerk support logs, TI support logs	standardized post-visit questionnaire (e.g. Zoom poll), surveys, focus group protocol
	Technology Reliability	How reliable is the technology used to deliver virtual care?	% visits with/without technology issues, number of appointments cancelled due to technical difficulties.		PE survey, post-visit questionnaire	EHR reporting data - reason for re-booking, post-visit questionnaire	qualitative & quantitative
	Satisfaction & future use	How satisfied are participants with vitual care access/availability? How satisfied are users with the telehealth service overall? How willing would users be to use this system in future?	measurement of patient experience, measurement of caregiver experience. Participant perception (provider or patient/caregiver), net promotor score (measure of customer satisfaction)	patient satisfaction survey scores, staff satisfaction survey scores, #complaints, # compliments	Patient satisfaction survey (select programs)	Standardized patient satisfaction survey across programs, Staff satisfaction survey	e.g. survey quarterly	satisfaction scores with in-person care, other virtual care programs internal and external
	Patient Centeredness	To what extent does care delivered virtually meet individual needs? E.g. Is the patient able to receive care in the way that is most convenient for them? (do they have a choice) Is the patient able to receive care with the family members / supports they require? (or not)	survey questions about patient-centredness (included in decision making, felt concerns were heard)	surveys					Aug 09 Question has been revised by Ind Exp Team to address EBG comments: EBG: I want to make sure we are highlighting patient choice/preference here - is the patient able to receive care in the way that is most convenient for them? E.g. With the family members / supports they require? (or not) - comments? Do we mean personalized like in personalized medicine? Ref? According to MedLinePlus.gov "p…
	Individual workload burden	Patient/caregiver level - To what extent is patient burden impacted by the virtual care delivery mechanism?	# workdays or missed school days due to health appts; reported anxiety/burden/distress?	surveys					Replaced previous title "Staff wellness and burnout" with the AAP title = Individual Workload burden. Where we agree with AAP framework keep consistent titles.
		Provider level - To what extent is the format of care provision impacting provider wellness? (revised)	PhysicianWork Life Study single-item measure, Stanford Prof Fulfillment index, Well-Being Index, Maslach Burnout Inventory, Oldenburg Burnout Inventory (all from STEM)	surveys	Yes - Organizational Pulse Survey, WFH Survey
Program Implementation (in place or hypothesized program)
	Leadership	Are leadership and key stakeholders adequately engaged? E.g. supporting appropriate prioritization at the organization level, clear communication strategy & change management plan	Participant perception Evidence of Organizational prioritization Evidence of Communication to organization Financial support from the organization? Clear expecation being set, monitored and supported Presence of goverance structure Evidence of delayed decision making Program appears on corporate structure or priority list.	Policy Governance Structure Surveys Reporting	Yes	Would need a survey that includes questions around leadership	qualitative & quantitative	Other programs funded by OH	consdier adding governance and change management in this section - pick a few clear example questions and work them through : potential measures/indicators, data sournces (all possible) what we have / don’t' have at CHEO, Data collection strategy, Basis of comparison.
		Is there clear governance and an escalation path?	Presence of governance structure with ToR	Decision matrix escalation diagram			qualitative & quantitative	Other programs funded by OH
		WAS ADEQUATE POLICY OR GUIDANCE PROVIDED FOR PROGRAM DELIVERY? (e.g. when to choose virtual, patient pop, practice standards, no exam required and +++)	Survey Resource material available	Survey			qualitative & quantitative	Other programs funded by OH
	Resources (human and financial)	Were the human resources provided adequate to support program needs? E.g. Physician, Nurse, Interpreter, Health Professional, Admin support, etc.	Survey of providers and families Needs assessment Any other indicators of resource need met / unmet?	Survey	Yes		Qualitative/quantitative	Other similar programs	please add example data sources, collection strategy and basis of comparison
		Were the right tools and equipment provided to support program delivery? (e.g. purchasing technology, tools, licenses)	Ease of use Volume of technical issues, change/optimization requests	Survey HelpDesk Tickets, Project intake / enhancement requests	Yes	??	Quantitative	Other similar programs	14feb CED,KM,JK moved/merged into Infrastructure & Tech
		Was appropriate funding secured to support and sustain the change (e.g. appropriate long term operational funding model)?	Operational Budget Approvals for resources, cost under/overrun	Budget Trackers, Audits	Project intake form Capital costs (finance)	??	Quantitative	Other similar programs	"
	Training & Support	Are training and support resources clear, comprehensive and kept up to date? E.g. Provider, patient/Caregiver and staff trianing resources	Observation of workflows Process for maintenance of training and support material	Survey Focus group Feedback from FAC Family and Youth Advisory Groups	??	program-specific surveys?	Qualitative/quantitative	Other similar programs	"
		Are training matierals and support services accessible? E.g. easy to find, avialable in multiple languages, meets accessibilty standards	Perceived Ease of access, webiste traffic Adherence to accessiblity complinace standared	Focus groups, Survey 3rd party review. Web traffic metirics			Qualitative/quantitative	Provincial guidelines for accessibility
		Is ongoing support in place for providers, patients, caregivers and staff? (e.g super users, issue management process)	Survey of provider, staff, families	Survey Error/use rate		May need to add additional questions to survey	Qualitative/quantitative	Other similar programs	"
	Infrastructure & Technology (functionality, performance, security)*	To what extent has Cybersecurity been reviewed and considered? E.g. Has a Threat Risk Assessment (TRA) been conducted?	# Access issues, Adherence to Cybersecurity standards, Number of threats or security breaches	Cyberreview by 3rd Party, Threat Risk Assessment (TRA), Cybersecurity monitoring tools	Yes		Quantatative	RSOC Canadian cyber security	Please spell out aconyms CED: Consider Cross-Reference with Canada Health Infoway Benefits Evaluation Framework which includes System Quality (Functionality, Performance, Security) - should security be its own sub-domain? What about other infrastructure elements e.g. availability and reliability of internet/network, information distribution chanels. CED/KM: Some duplication with Health Delivery, …
		Do providers and/or patients have appropriate access to information required to support care delivery? E.g. access to whole patient chart, ability to communicate with other providers, or provide followup information to patients	Surveys to providers, staff, patients/families, Safety Reporting System, Number of ROI requests	Survey	Yes	??	qualitative & quantitative	Other similar programs	Are we missing something about Information quality - content/availability - e.g. do providers have accessto whole patient chart, communication with other providers, is information able to be transmitted securely ...I'm thinking about some of our challenges with AVS printing... not sure if it belongs here or in Helath Delivery.
		Is the technology appropriate? To what extent does the technology support virtual care service delivery?	%planned/un-planned downtime, # requests for change/optimization, volume of technical issues, Needs assessment/requirements evaluation	HelpDesk Tickets/IT rports, Project intake / enhancement requests, Post-encounter questionnaires	We have a patient survey	post encounter questionnaires, patient experience survey, technology issues reports	Quantitative	Other similar programs	What is the scope of technology for this sub-domain? consider specifying information systems and end user devices? Vs technology usability assessment that might fall under "Individual Experience" domain
	*note privacy is under health delivery

## Sheet: T1 Diabetes Clinic Example
Virtual Care Evaluation Framework			Objectives
Why are we doing this		It is critical to monitor both the performance of telehealth programs, creation of new telehealth programs and how existing programs change. This ensures care is delivered in manner consistent with standards of in-person patient care. Although a few measurement standards exist to guide the assessment of telehealth’s impact on the care delivered, current literature lacks a unified approach to eval…					Virtual Care will be defined in the companion document. Virtual Care and Telehealth are the most appropriate terms used in literature (providing care, at a distance using technology) - may need to re-do this analysis once framework finalized. Items in italics are not in AAP STEM framework (we will probably have to cross -ref again at the end) Items in bold - sub-domains align with HQO Quality Ele…
Origins & Evolution		Adapted and modified from AAP (Chuo, 2020). Reframed for canadian pediatric context beyond COVID-19 and include practical examples that suport use. Augmented or added elemnts from HQO, technology Usability Questionnaire, CHI BE Framework ++
Intended users of this framework		Primary Users (people who plan, conduct and use results of an evaluation)	Secondary Users (people at other organizations who might be interested in using this tool to evaluate their own virtual care services/programs)	Tertiary Users (oversight and funding agencies)
Who are we designing this tool for?		CHEO Departments and Division Clinical or Operational Leadership (Directors, Managers, Service Providers), Clinical Investigators,	Other Hospitals, Health Authorities,	Funding bodies, e.g. MOH
Example Virtual Care Evaluation Plan for Type 1 Diabetes clinic, integrated EHR context
Program overview		Multidisciplinary pediatric program offering in-person and virtual, synchronous and asynchronous care.
Program objectives		Support patients and families in managing their diabetes to achieve their best life, through synchronous and asynchronous multidisciplinary support from diagnosis until transition to adult care (age 18 years)
Domain	Sub-domain/thematic areas	Major Evaluation Questions	Potential Measures/Indicators	Data Sources	YES We have the following data sources	NO What data sources do we need to develop?	Data Collection Strategy	Basis of Comparison
Health Outcomes
	Physical	What is the impact of virtual care on individual physiological/clinical measures of diabetes-related health?	Indicators of glycemic control: Hemoglobin A1C (A1C); Continuous Glucose Monitor (CGM) metrics (e.g., % time in range, % time below range or glucose managment index (GMI) Acute complications (e.g., severe hypoglycemia, diabetic ketoacedosis (DKA), emergency visits or admissions related to diabetes) Long-term complications (e.g., retinopathy, neuropathy, nephropathy)	Patient charts, electronic health record (EHR) reports and dashboards by clinic, Institute for Evaluative Sciences (IC/ES) (for patients who have accesed healthcare services at other centres within province), provincial, national and international diabetes databases	Yes, EHR data warehouse		Quantitative (e.g., chart review, data warehouse queries, reporting tools, survey databases)	In-person visits in same clinic, established patient registries (regional or international), other hospitals, literature, historical data (for in-person programs)
		What is the impact of virtual care on population level physiological/clinical measures of diabetes-related health?	Same as D-14 but from population perspective (e.g., % of patients with A1C or GMI within target; rate of DKA in diabetes clinic population)		Yes, EHR but need to build new reporting fields, Caboodle
	Mental & Behavioural	To what extent does virtual in-home assessment/treatment address the mental health (MH) needs of patients (and/or caregivers of patients) with T1D	Frequency of MH assessment; MH status using diabetes-specific MH scales/tools (e.g., Problem Areas in Diabetes for Teens (PAID-T) (1) (patient self-report) for diabetes distress) or generic MH scales (e.g., Patient Health Questionnaire (PHQ-9) (2) and Children's Depression Inventory (CDI) (3) for depression (patient self-report), Generalized Anxiety Scale GAD-7 for anxiety (4)	Patient charts, patient/caregiver or family reported outcomes (e.g., responses to standardized instruments)	Yes. RCADS (youth self-report anxiety/depression), ASQ (Ask Suicide Questions); Strenghts and Difficulties Questionnaire (SDQ; self/caregiver report); currently working on getting some of these into EHR	We do not have post-treatment quesionnaires for most services; no clinician reports, need to develop more in EHR Patient Portal		See I-13, community/clinical normative data
		What is the impact of virtual care on population level psychological measures of health in patients with T1D?	Proportion of patients within clinical range (or positive) for measures listed in D-15			Ensure scored measures are captured in EHR and reported out with comparison to clinical cut-offs /benchmarks (e.g. determine average score/population and compare against clinical norms or scores for virtual vs inperson)
	Quality of Life	What is the impact of vitual care on health-related quality of life (QOL) for patients (or caregivers of patients) with T1D?	Diabetes specific QOL instruments: Type 1 Diabetes and Life (T1DAL) (5) (patient self-report); PedsQL Diabetes (patient self and parent-proxy report) (6); Monitoring Individual Needs in Diabetes Youth Questionnaire (MY-Q) (7) Generic instruments used in diabetes: PedsQL (6) for QOL (for child self-report and proxy)		None	Routine collection via patient portal
Health Delivery
	Access (timeliness & equity)	How does virtual care compare to in person care with regard to timely access to diabetes care (time between need identified/requested and care delivered)?	Wait times: between scheduled diabetes clinic visits; between request for and access to non-scheduled diabetes educator support; between request for transition to insulin pump therapy (from injections) to insulin pump start	Patient charts, EHR reports and dashboards	Yes		Quantitative	See I-13, community/clinical normative data
		Is the program accessible to all patients/ families with T1D? If not, what are the barriers to access?	Patient/caregiver and provider perceptions; % visits conducted (or supported) with interpretation in patients preferred language; association between measures of deprivation (e.g., Deprivaton Indices (DI), equity screening tools) and access to virtual care when desired	See E-19, patient/caregiver surveys, interviews, focus groups; provincial and national deprivation indices (e.g., ON-Marg)	EHR but need to build new reporting fields IT reports, booking numbers	Patient/caregiver surveys & interview protocol	Quantitative & qualitative	See I-13, other clinics within same hospital, other virtual care programs
		Are there barriers to sharing/accessing required T1D-specific health information or technology required for comprehensive virtual T1D care?	Sufficiency of provider access to diabetes data (e.g., blood glucose logs, insulin pump data that require digital upload from home); % unable to access video visits when desired due to lack of internet access and/or computer/device to do so; % access to patient portal when required to share information			Care proivder survey, family survey
	Privacy	To what extent do patients with T1D feel comfortable sharing openly with their provider during virtual visits (as a function of the patient or provider's home/work environment)?	Patient and provider perception; documentation of screening or discussion re: private topics substance use, sexual health in adolescents	Patient charts, patient/provider surveys	patient experience reports, patient satisfaction surveys (select programs)	Standardized patient satisfaction survey across programs,
		To what extent can we adhere to privacy and confidentiality standards for adolescents with T1D?	Reported privacy breaches, privacy impact assessment, patient/provider perception	Local safety reporting system, privacy office audits/reports; patient/provider surveys, interviews and focus groups, patient experience data (complaints)				See I-20, national/organizational privacy standards
	Safety	Does virtual care introduce safety risks in patients with T1D? E.g. How frequently is there a missed diagnosis due to limitations of a virutal encounter?	Incidence or prevalence of DKA and severe hypoglycemia in patients with known T1D; incidence of late or missed T1D-associated diagnoses (e.g., eating disorder or hypertension missed due to lack of physical exam)	See E-13	Yes		Quantitative	See I-13
	Efficiency (time and resources)	To what extent is there a cost difference to the organization/providers to deliver virtual T1D care compared to in person?	Net cost for in-person diabetes visits (check-in clerk, staff doing vitals, technology upload, and point of care A1C) vs. virtual visits including supplementary costs for resources required to support virtual care (e.g., resourcing drive-thru A1C clinic (8))	Clinic/hospital financial reports; billing records	Yes, event tracking, need to build new fields in EHR	time stamp fucntion for workload measurement for all user groups	Quantitative	In-person programs, historical data, cost models
		To what extent is there a cost difference to patients/caregivers with T1D to receive virutal care compared to attending an in person visits?	Cost of travel (time and monetary) to tertiary care diabetes clinic; missed school and work	Patient/provider surveys, interviews	Yes, Patient Portal (e.g. MyChart), EHR	patient/provider survey or interviews	Quantitative & qualitative
		Are T1D virtual visits more/less efficient time-wise for providers and/or patients and caregivers compared to in person visits?	Patient/family visit preparation time, clinic (virtual vs in-person) wait time, visit duration (total vs. time with diabetes doctor or educators), patient and provide perceptions	EHR reports and dashboards, patient/provider surveys, interviews, focus groups	EHR,possible but not well captured
	Effectiveness	How well is the T1D virtual care program delivering the care as intended (in terms of quality and quantity)?	% adherence to Diabetes Canada (9) and International Society of Pediatric and Adolescent Diabetes (10) practice guidelines, e.g., % patients with minimum of three A1C measurements/year, % patients with three visits/year, completeness of complication screening; frequency of MH screening, availability of structured diabetes education, provider/patient/caregiver reports of care quality and completen…	See E-13, provider/patient/caregiver surveys, interviews, focus groups	Yes, EHR (e.g. lab reports, flowsheets) best practice advisory overrides with the reason of unable to perform.	May need to buildnew reporting fields or flowsheets	Quantitative & qualitative	See I-20
		How do T1D virtual vists compare to in person visits with regard to return visit frequency?	Diabetes related emergency department visits, # unscheduled patient support calls to diabetes educators or to diabetes doctor on call between visits	See E-13, provider/patient/caregiver surveys, interviews, focus groups	Yes, EHR but need to build new reporting fields	Patient/provider perceptions	Quantitative	See I-13
		In which circumstances (if any) are T1D virtual visits more or equally as effective as in-person visits?	Indicators in D 28-29 as modified by patient or clinical characterisitcs (e.g., diabetes duration, age, diabetes technology use, patient portal access)	See E-28	Yes	patient/caregiver survey, provider survey, nursing focus group protocol	Quantitative & qualitative
Individual Experience (patient, caregiver, provider, support staff)
	Usefulness	How useful do patients/families perceive T1D-related health care to be when it is delivered virtually as compared to in-person?	Patient/provider perception (e.g., replace or postpone in-person diabetes visit vs. in person still required?; quality same, better or worse compared to in-person)	Patient/family and provider questionnaires, interviews, focus groups	Post-encounter questionnaires/ Patient Experience survey	post encounter questionnaires, patient experience survey	Qualitative & quantitative	In-person visits in same clinic, literature, historical data (for in-person programs)
		To what extent is the method of connecting (to patient/provider) easy to use in T1D care?	Participant perceptions (patients, caregivers, providers), # support calls to virtucal care clerk and diabetes clerk, number of help desk calls	See E-32, support logs	post-visit questionnaires (service-specific), EHR, IT reports	standardized post-visit questionnaires, observation, interviews		See I-32, internal and external virtual care programs
	Interaction Quality	Is the quality of the patient/provider interaction re: T1D care supported by virtual care technology sufficient?	Participant perception (patients, caregivers, providers)		Virtual Care Clerk support logs, TI support logs	standardized post-visit questionnaire (e.g. Zoom poll), surveys, focus group protocol
	Technology Reliability	How reliable is the technology used to deliver virtual care?	% visits with/without technology issues, # of appointments cancelled due to technical difficulties, # visits converted from video to telephone due to technology issues		PE survey, post-visit questionnaire	EHR reporting data - reason for re-booking, post-visit questionnaire
	Satisfaction & future use	How satisfied are patients/families with T1D vitual care access/availability? How willing would users be to use this system in future for T1D care?	Patient/family perception including validated tools measuring perceived quality of care (e.g., Perceived quality of medical care (PQMC) (11) instrument, Client Satisfaction Questionnaire (CSQ) (12))	Patient satisfaction survey scores, staff satisfaction survey scores, patient experience data (# of complaints, # of compliments)	Patient satisfaction survey (select programs)	Standardized patient satisfaction survey across programs, Staff satisfaction survey
	Patient Centeredness	To what extent does care delivered virtually meet individual needs? (e.g., do they have a choice regarding visit modality; does the modality allow them to receive care with desired family members/supports)	Patient/family perception of patient-centredness (included in decision making, felt concerns were heard)	Patient/family and provider questionnaires, interviews and focus groups
	Individual workload burden	Patient/caregiver level - To what extent is patient burden impacted by the virtual T1D care delivery mechanism?	# of workdays or missed school days due to health appointments; perceived burden of visit preparation (e.g., uploading devices from home; obtaining home height and weight measurements)
		Provider level - To what extent is the format of T1D care provision impacting provider wellness?	Generic well-being/burnout instruments (e.g., Physician Work Life Study single-item measure (13), Well-Being Index (14), Maslach Burnout Inventory (15))		Yes - Organizational Pulse Survey, WFH Survey
Program Implementation (in place or hypothesized program)
	Leadership	Are leadership and key stakeholders adequately engaged in the T1D care program?	Staff (clerical, health professional/MD, trainee) perception of leadership support from division chief and clinic manager Resource support from the organization? (e.g., virtual care patient services clerk; prioritization of digital tool requests) Clear expecation being set, monitored and supported (e.g., % virtual vs in-person)	Organizational/governance structure documents, staff/provider surveys, interviews, focus groups, EHR reports and dashboards	Yes	Would need a survey that includes questions around leadership	Qualitative & quantitative	Other virtual care programs within and outside of diabetes and home hospital
	Resources (human and financial)	Were the human resources provided adequate to support T1D program needs?	Survey of providers and families (adequate access to all members of multi-disciplinary team during/before/after visit); sufficiency of clerical and administrative support to operationalized hybrid in-person/virtual model	Patient/family and provider surveys, interviews and focus groups	Yes			In-person programs/visits, other virtual care programs
		Are training materials and support services accessible?	Availability of resources on external website for patients/families and on internal website for providers	See E-42, third party review, web traffic metrics				Provincial guidelines for accessibility
		Do providers and/or patients have appropriate access to information required to support T1D care delivery?	Surveys to providers, staff re: access to diabetes technology platforms and external results/documentation; surveys to patients/families re: their access to external 3rd party diabetes technology platforms	See E-42	Yes	??		Other virtual care programs
	*note privacy is under health delivery
